# Supplementary material for: Imaging calcium microdomains within entire astrocyte territories and endfeet with GCaMPs expressed using adeno-associated viruses
Source: PubMed Central journal article supplement — J Gen Physiol. 2013 May;141(5):633–47. doi: 10.1085/jgp.201210949 (PMC3639581; doi:10.1085/jgp.201210949), 2013-05
Supplement: supp_jgp.201210949_JGP_201210949_sm.pdf [file supp_jgp.201210949_JGP_201210949_sm.pdf]

Shigetomi et al., <http://www.jgp.org/cgi/content/full/jgp.201210949/DC1>

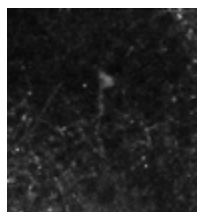

**Video 1.** Movie of an astrocyte loaded with Fluo-4AM and imaged for 5 min. This cell is analyzed and shown in Fig. 3 A of the Results.

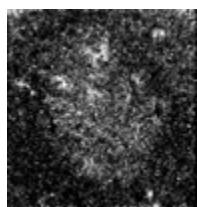

**Video 2.** Movie of an astrocyte expressing Lck-GCaMP3 and imaged for 5 min. This cell is analyzed and shown in Fig. 3 A of the Results.

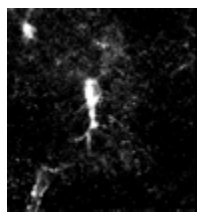

**Video 3.** Movie of an astrocyte expressing cyto-GCaMP3 and imaged for 5 min. This cell is analyzed and shown in Fig. 3 A of the Results.

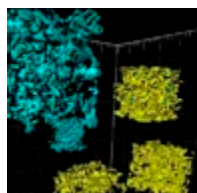

**Video 4.** Movie of a Golgi-impregnated astrocyte imaged by serial block-face SEM. The volume dimensions are  $90 \times 90 \times 87 \mu\text{m}$ . The yellow and cyan regions correspond to perisomatic and peripheral subvolumes of astrocytic branchlets that have been surface rendered. Perisomatic and peripheral subvolumes all exhibit dense ramifications of fine branchlets.
